# Supplementary material for: Finding functional associations between prokaryotic virus orthologous groups: a proof of concept
Source: PubMed Central journal article supplement (PMC8442406; doi:10.1186/s12859-021-04343-w), 2021-09-15

# ROC Curves for all datasets

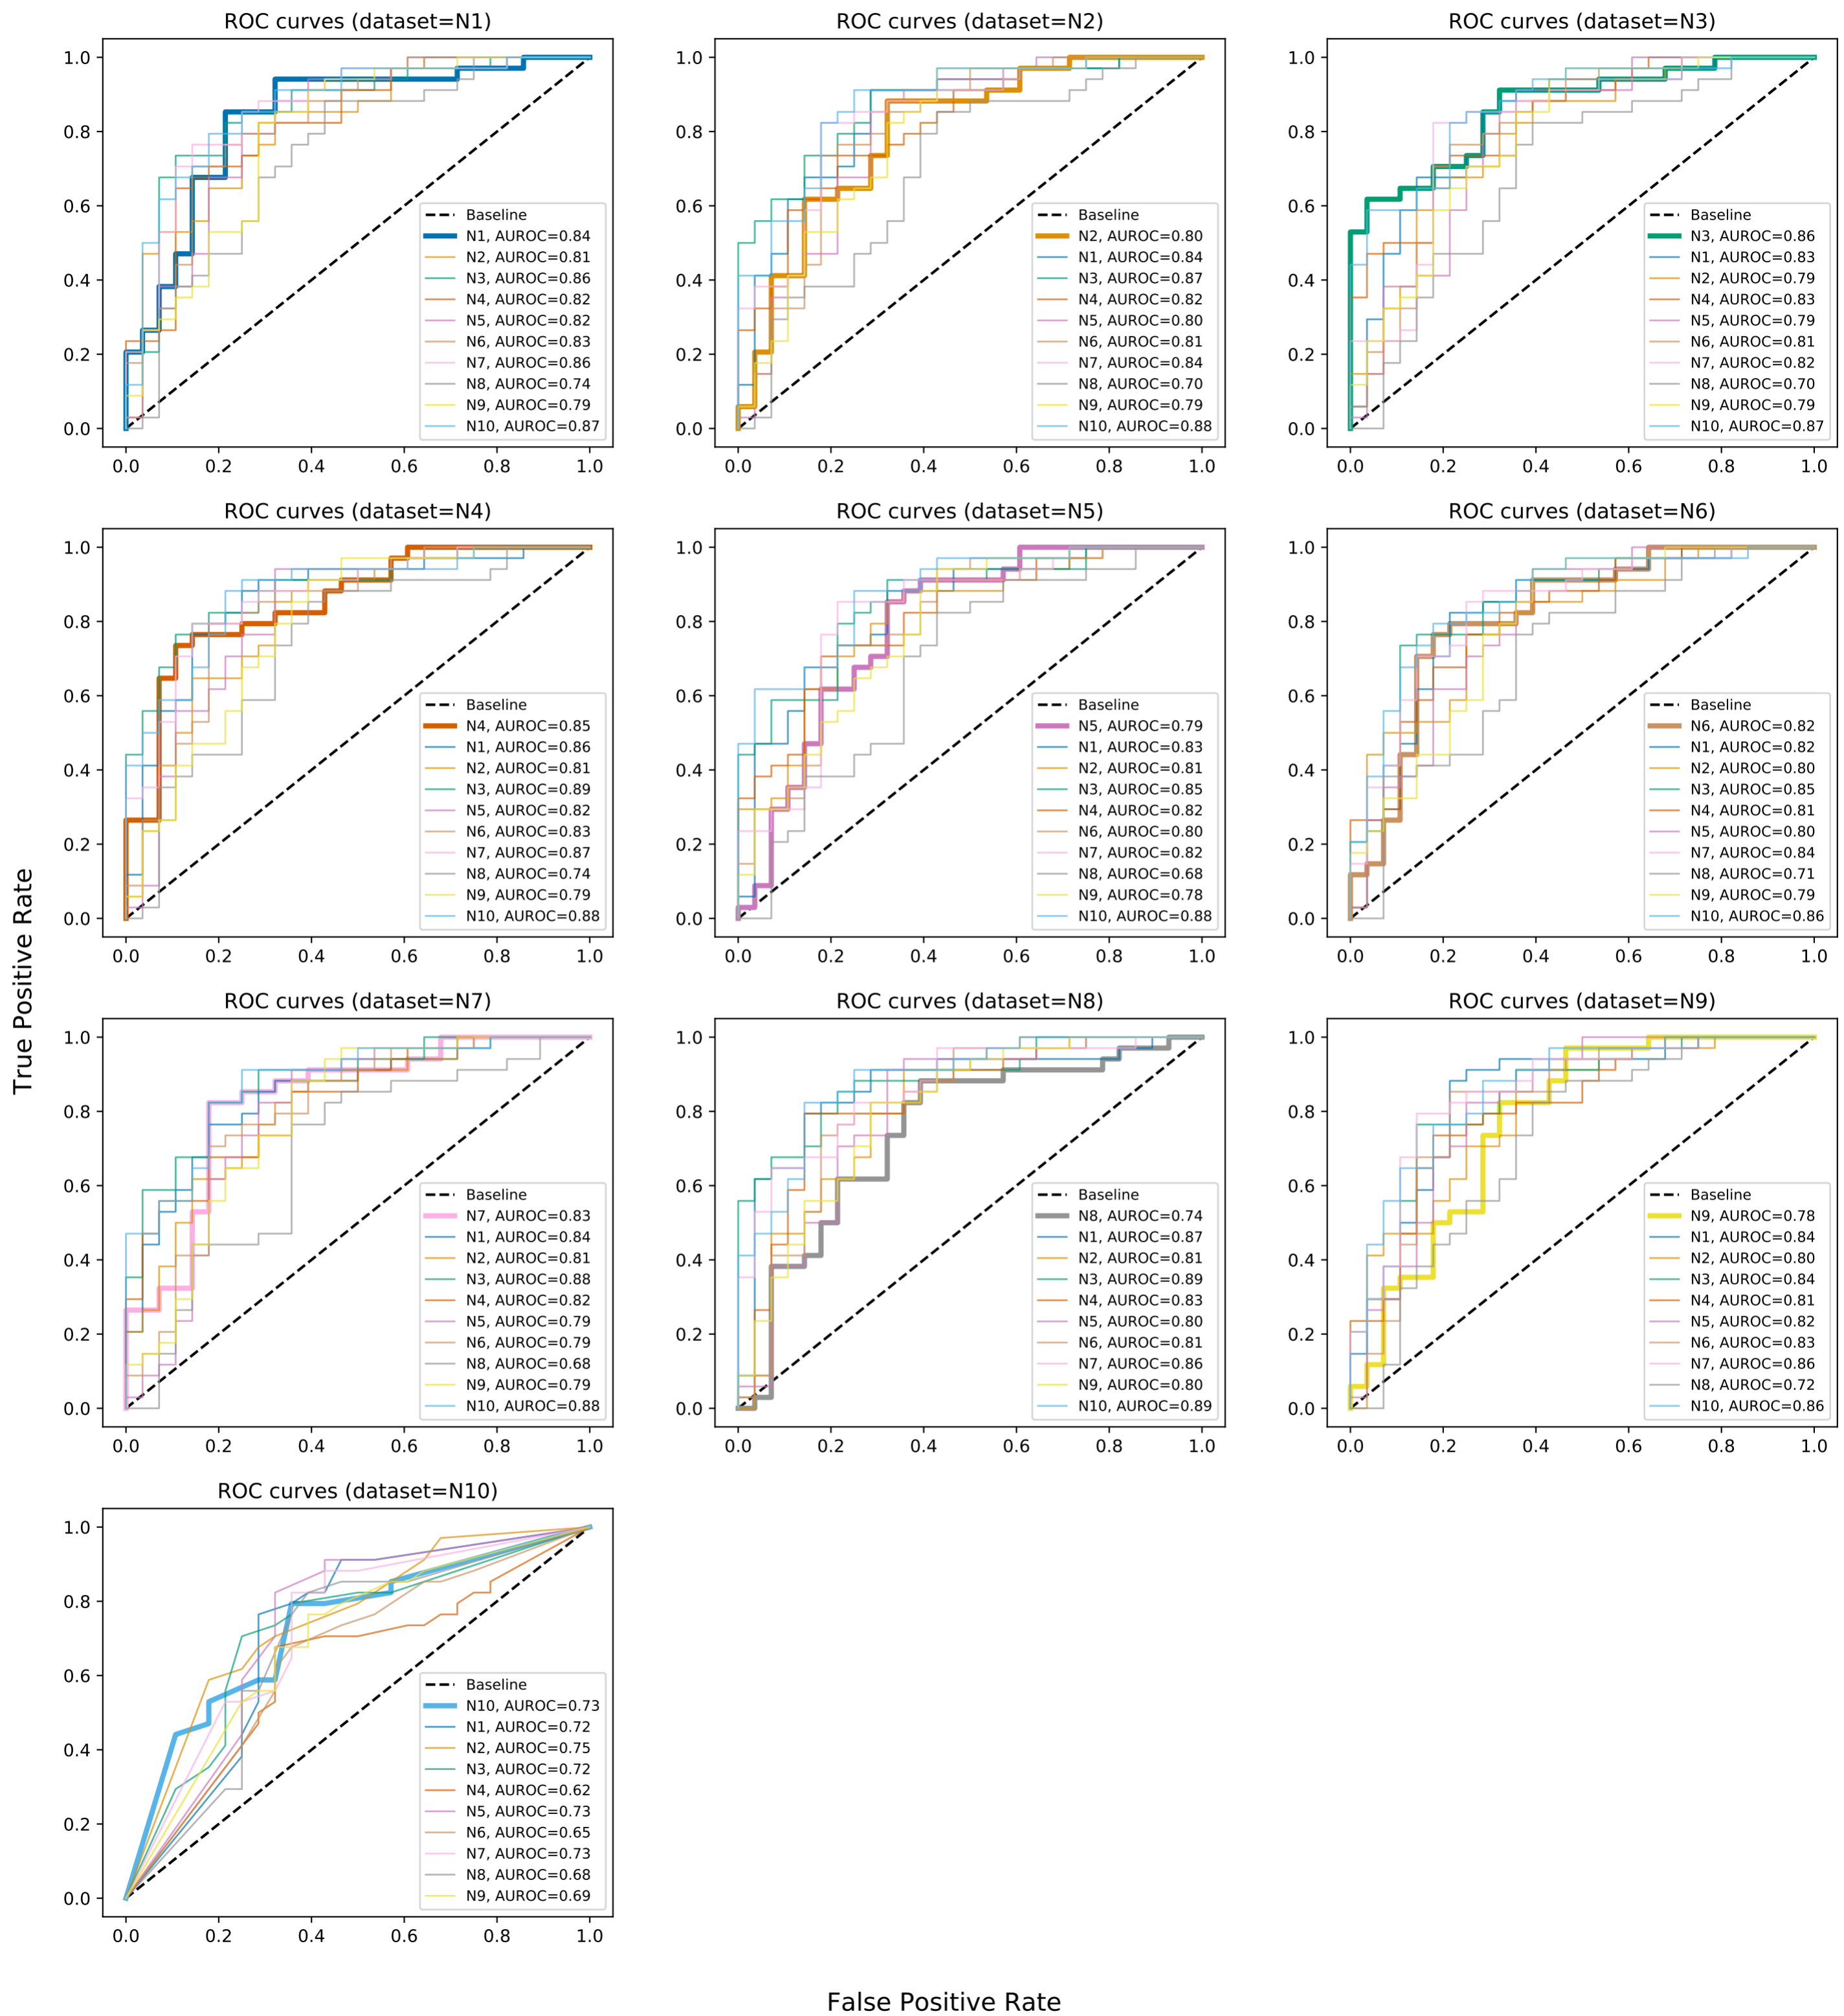

Supplement: 12859_2021_4343_MOESM4_ESM.pdf [file 12859_2021_4343_MOESM4_ESM.pdf]
